# Supplementary figures and images for: Renal Safety of [177Lu]Lu-PSMA-617 Radioligand Therapy in Patients with Compromised Baseline Kidney Function
Source: MDPI journal article supplement (doi:10.3390/cancers13123095), 2021-06-21

## Supplement

### PSMA-RLT course of all patients

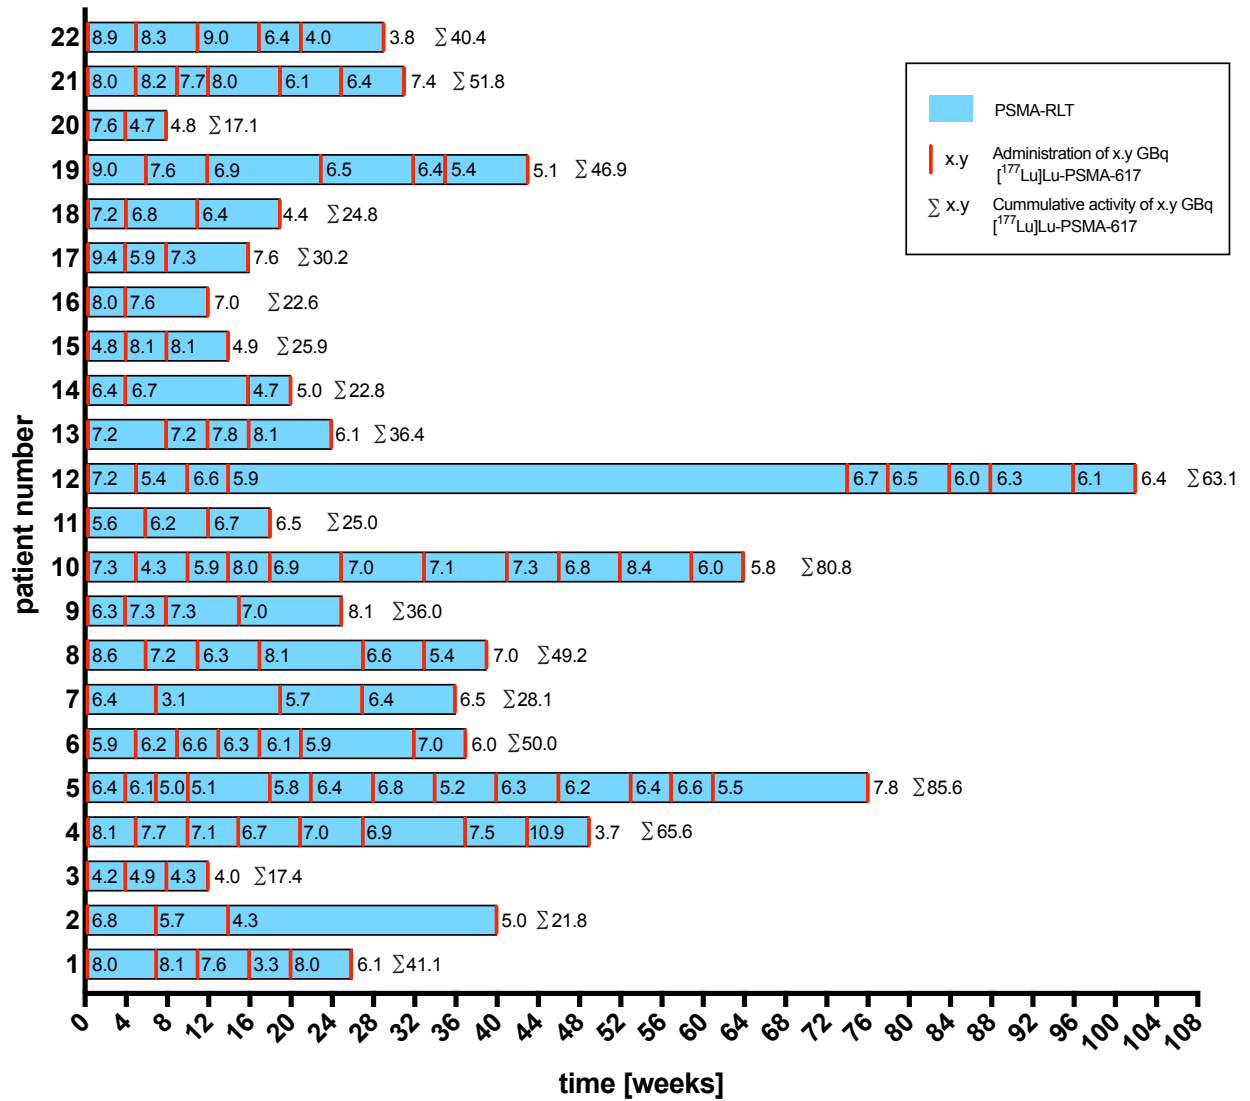

Figure S1: Individual PSMA-RLT course of all patients.

Supplement: s1 [file s1]
